# Supplementary material for: B7-H3–Targeting Chimeric Antigen Receptors Epstein-Barr Virus–specific T Cells Provides a Tumor Agnostic Off-The-Shelf Therapy Against B7-H3–positive Solid Tumors
Source: PubMed Central journal article supplement (PMC11149603; doi:10.1158/2767-9764.crc-23-0538), 2024-06-04
Supplement: crc-23-0538-s03.pdf [file crc-23-0538-s03.pdf]

# Supplementary Table 1

| Anatomic Site    | B7-H3 staining pattern and distribution                                                                                                                                                                |
|------------------|--------------------------------------------------------------------------------------------------------------------------------------------------------------------------------------------------------|
| Cerebrum         | Negative staining                                                                                                                                                                                      |
| Cerebellum       | Negative staining                                                                                                                                                                                      |
| Pituitary        | Mostly very weak cytoplasmic staining (1+) in epithelial cells.                                                                                                                                        |
| Thyroid          | Negative staining                                                                                                                                                                                      |
| Lung             | Weak cytoplasmic staining (1+) of pneumocytes. Macrophages show prominent membrane staining (1+).                                                                                                      |
| Kidney           | Negative staining                                                                                                                                                                                      |
| Skeletal muscle  | Negative staining                                                                                                                                                                                      |
| Adrenal gland    | Weak membrane and cytoplasmic staining (1+) in about 30% of epithelial cells.                                                                                                                          |
| Ovary            | No germinal epithelium. Very weak staining (1+) in stroma and histiocytes looking cells.                                                                                                               |
| Pancreas         | Mostly weak cytoplasmic staining (1+) in epithelial cells. Very weak staining in stroma.                                                                                                               |
| Testis           | Mostly weak cytoplasmic staining (1+) in germinal epithelial cells (within seminiferous tubules). Leydig cells show moderate staining (2+).                                                            |
| Spleen           | Very weak and uniform staining (1+ in red pulp. No definitive staining in white pulp.                                                                                                                  |
| Thymus           | Weak staining (1+) in islands of thymocytes and stromal cells.                                                                                                                                         |
| Bone marrow      | Weak cytoplasmic staining (1+) of haematopoietic cells.                                                                                                                                                |
| Larynx           | Weak staining (1+) in basal layer of squamous lining and perinuclear area of some chondrocytes. Nonspecific staining in the matrix of the cartilage.                                                   |
| Myocardium       | Very weak cytoplasmic staining (1+).                                                                                                                                                                   |
| Esophagus        | Weak staining (1+) in basal layer of squamous lining. Smooth muscles, blood vessels and stroma show weak staining (1+).                                                                                |
| Stomach          | Weak staining (1+) in mucosa epithelial cells.                                                                                                                                                         |
| Small intestine  | Luminal glands are negative. Submucosal glands show weak staining (1+), fibrovascular cores of glands have stronger staining.                                                                          |
| Colon            | Weak staining (1+) in mucosa epithelial cells, stroma and plasma cells.                                                                                                                                |
| Prostate         | Weak to moderate staining (1-2+) in epithelial cells. No staining in stroma.                                                                                                                           |
| Cervix           | Weak staining (1+) in epithelial cells. Very weak staining of stroma.                                                                                                                                  |
| Bladder          | Weak staining (1+) in transitional epithelium. Bladder muscle is negative.                                                                                                                             |
| Peripheral nerve | Very weak staining (1+) in stroma and blood vessels.                                                                                                                                                   |
| Mesothelium      | Weak cytoplasmic staining (1+) of pneumocytes and macrophages. Mesothelial cells are negative.                                                                                                         |
| Breast           | Ductal epithelial cells showing weak staining (1+). Stroma show weak to moderate staining (1-2+).                                                                                                      |
| Tonsil           | Germinal center cells of lymphoid follicles show moderate staining (2+). Basal cells of squamous epithelium and sinusoids show weak staining (1+).                                                     |
| Lymph node       | Germinal center cells of lymphoid follicles show weak to moderate staining (1-2+). Weak cytoplasmic staining (1+) of some lymphoid cells.                                                              |
| Liver            | Weak to moderate staining (1-2+) in hepatocytes.                                                                                                                                                       |
| Salivary gland   | Weak to moderate staining (1-2+) in glandular epithelial cells.                                                                                                                                        |
| Endometrium      | Weak to moderate staining (1-2+) in endometrium and weak staining (1+) in myometrium.                                                                                                                  |
| Placenta         | Syncitio and cytotrophoblasts show weak staining (1+) whereas stroma inside the chorionic villi show moderate staining (2+). Those looking like decidua cells show moderate to strong staining (2-3+). |
| Skin/Thigh       | Moderate staining (2+) in basal layer of skin and subcutaneous tissue.                                                                                                                                 |

**Supplementary Table 1.** Detailed description of B7-H3 expression and localization in healthy human tissues.
