# Supplementary material for: B7-H3–Targeting Chimeric Antigen Receptors Epstein-Barr Virus–specific T Cells Provides a Tumor Agnostic Off-The-Shelf Therapy Against B7-H3–positive Solid Tumors
Source: PubMed Central journal article supplement (PMC11149603; doi:10.1158/2767-9764.crc-23-0538), 2024-06-04
Supplement: crc-23-0538-s05.pdf [file crc-23-0538-s05.pdf]

# Supplementary figure 3

**A**

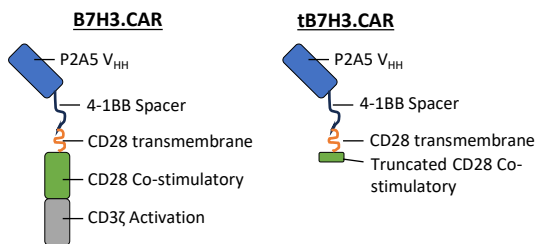

**B**

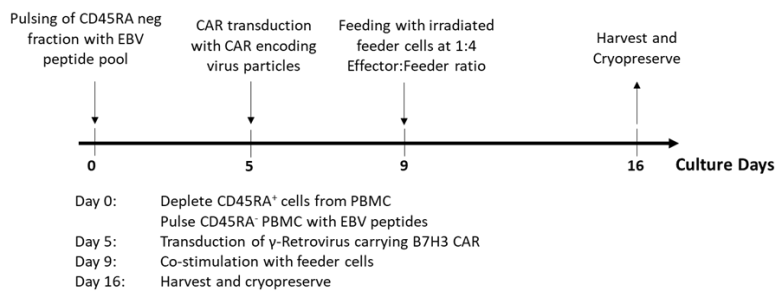

**C**

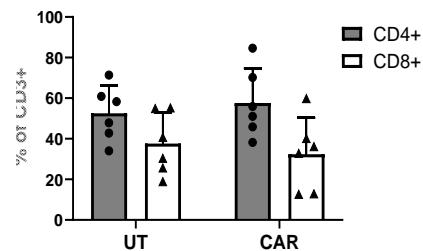

**D**

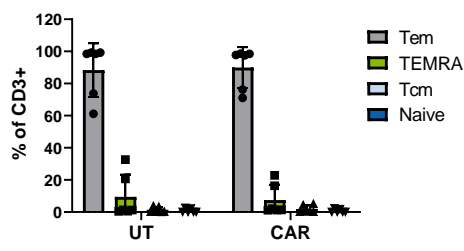

**E**

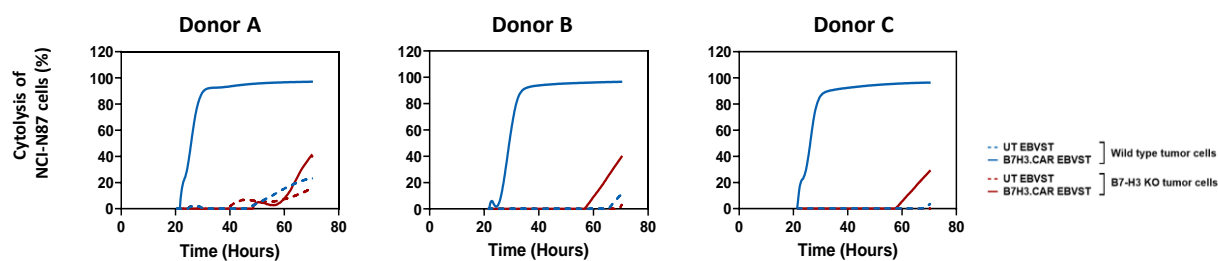

**F**

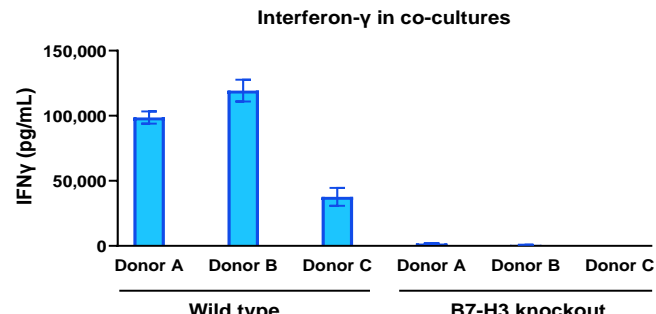

**G**

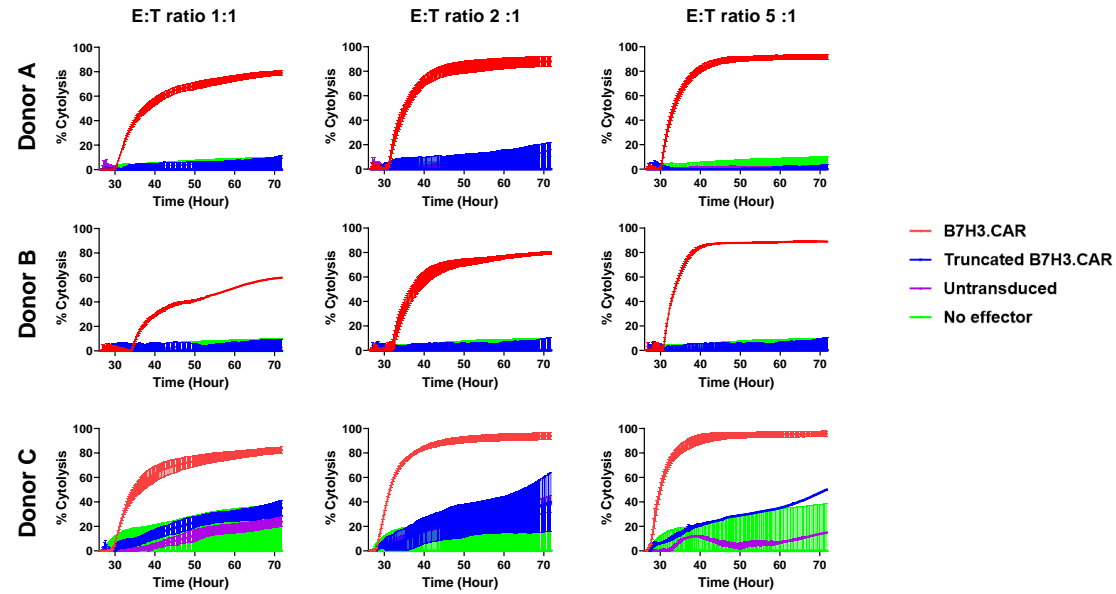

**H****IFN- $\gamma$  production**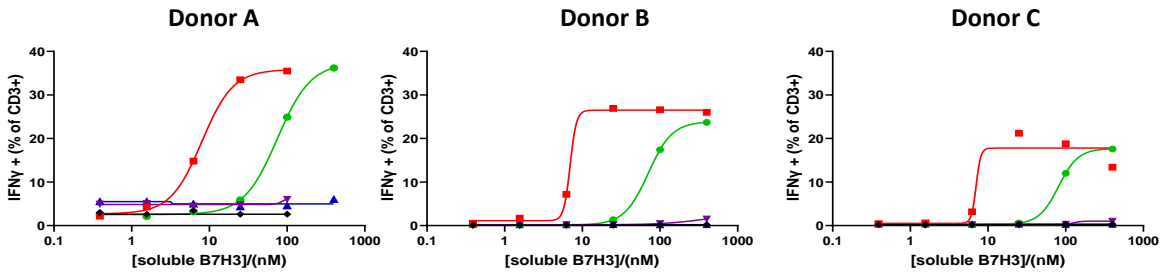**TNF- $\alpha$  production**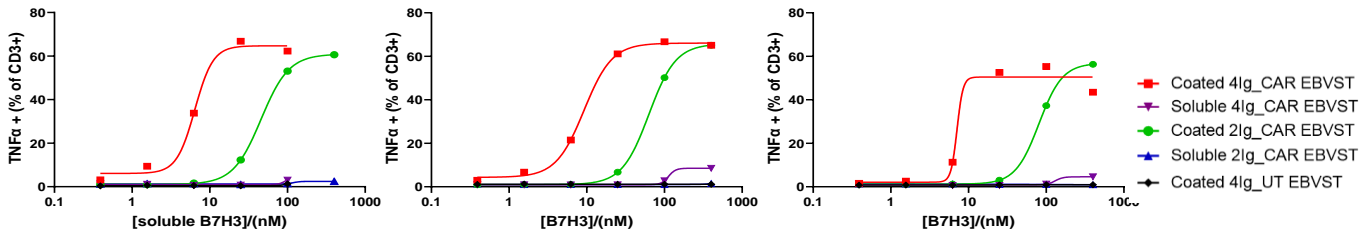

**Supplementary figure 3.** Further characterization of B7H3.CAR EBVSTs and their specificity for B7-H3. **A**, Schematic representation of the B7H3.CAR consisting of a B7-H3-targeting VHH clone P2A5, 4-1BB derived spacer, CD28 transmembrane domain, and CD28 and CD3 $\zeta$  signalling domains (left panel). A truncated version of the B7H3.CAR (right panel) lacking functional signaling domains was generated as a control. **B**, Manufacturing protocol to generate CAR EBVSTs. **C**, CD4 $^{+}$  and CD8 $^{+}$  T cell frequencies among EBVSTs at final harvest. **D**, Memory subset proportions among EBVSTs at final harvest based on cell surface staining of CCR7 and CD45RA. Tem, effector memory; TEMRA, terminally differentiated effector memory expressing CD45RA; Tcm, central memory. **E**, Kinetics of B7H3.CAR EBVST cytotoxicity against B7-H3 $^{+}$  NCI-N87 gastric cancer cells and their B7-H3 knock-out counterparts at a 1:1 Effector : Target ratio. **F**, IFN- $\gamma$  levels in supernatants after co-incubation of B7H3.CAR EBVSTs with N87 or N87-B7H3KO tumor cells. **G**, Cytotoxicity of ATCs expressing full length or truncated B7H3.CAR or no CAR against wild type MKN-45 gastric cancer cells. **H**, Percentages of CD3 $^{+}$  EBVSTs expressing IFN $\gamma$  (top) or TNF $\alpha$  (bottom) after overnight stimulation with plate-coated or soluble B7-H3. Data presented are from 6 (**C and D**) or 3 (**E-H**) healthy donors. Error bars represent means  $\pm$  SD where applicable.
