# Supplementary material for: B7-H3–Targeting Chimeric Antigen Receptors Epstein-Barr Virus–specific T Cells Provides a Tumor Agnostic Off-The-Shelf Therapy Against B7-H3–positive Solid Tumors
Source: PubMed Central journal article supplement (PMC11149603; doi:10.1158/2767-9764.crc-23-0538), 2024-06-04
Supplement: crc-23-0538-s08.pdf [file crc-23-0538-s08.pdf]

# Supplementary figure 6

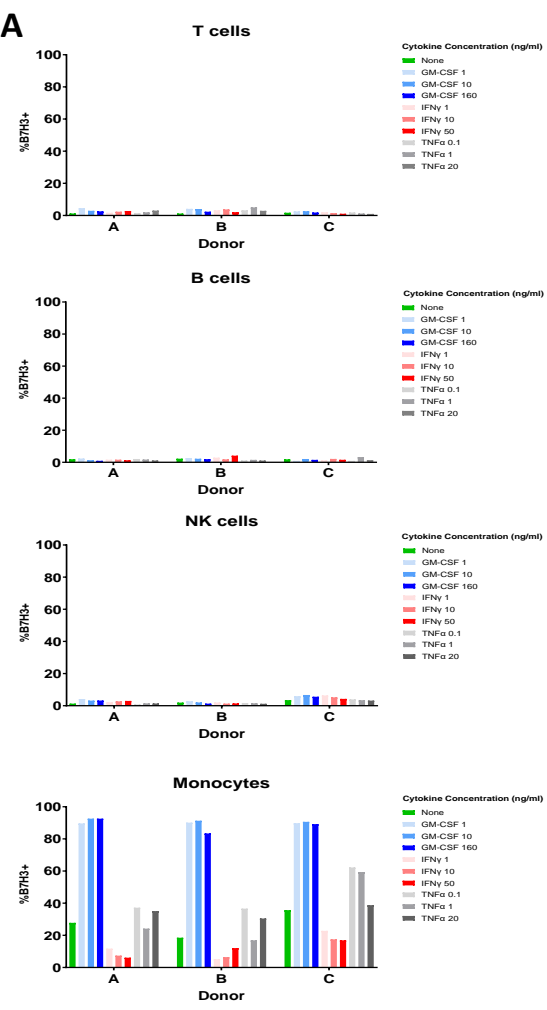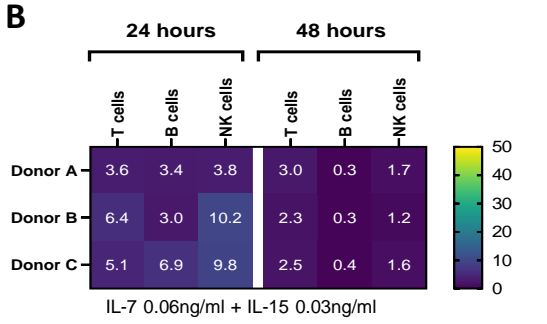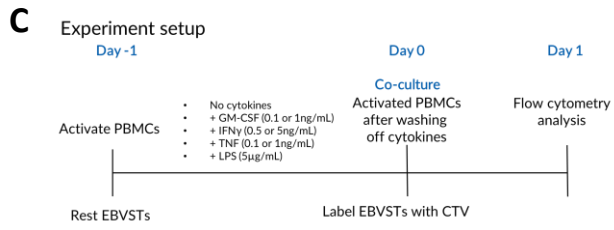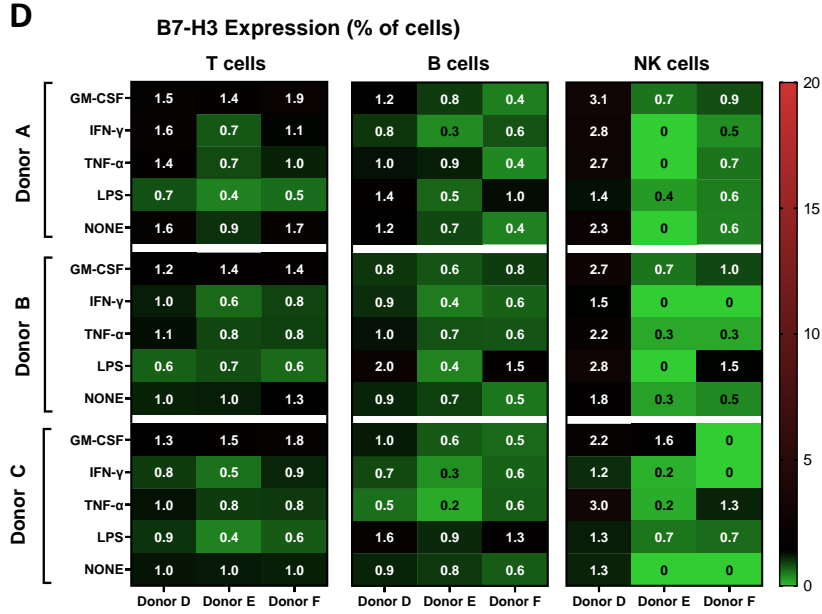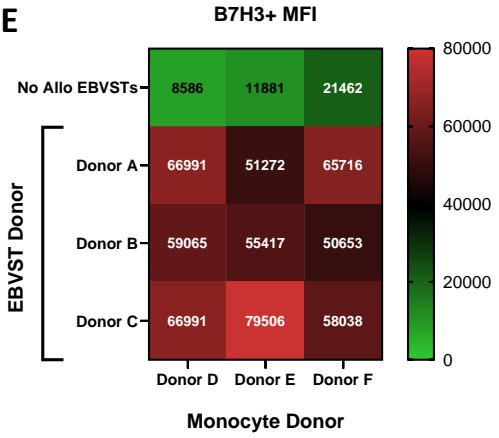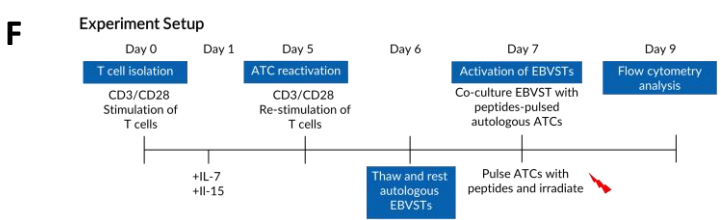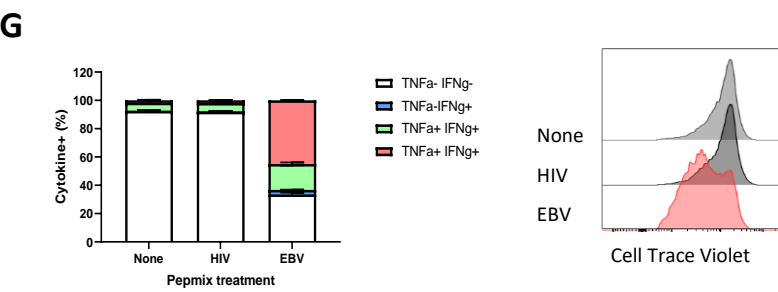

# Supplementary figure 6

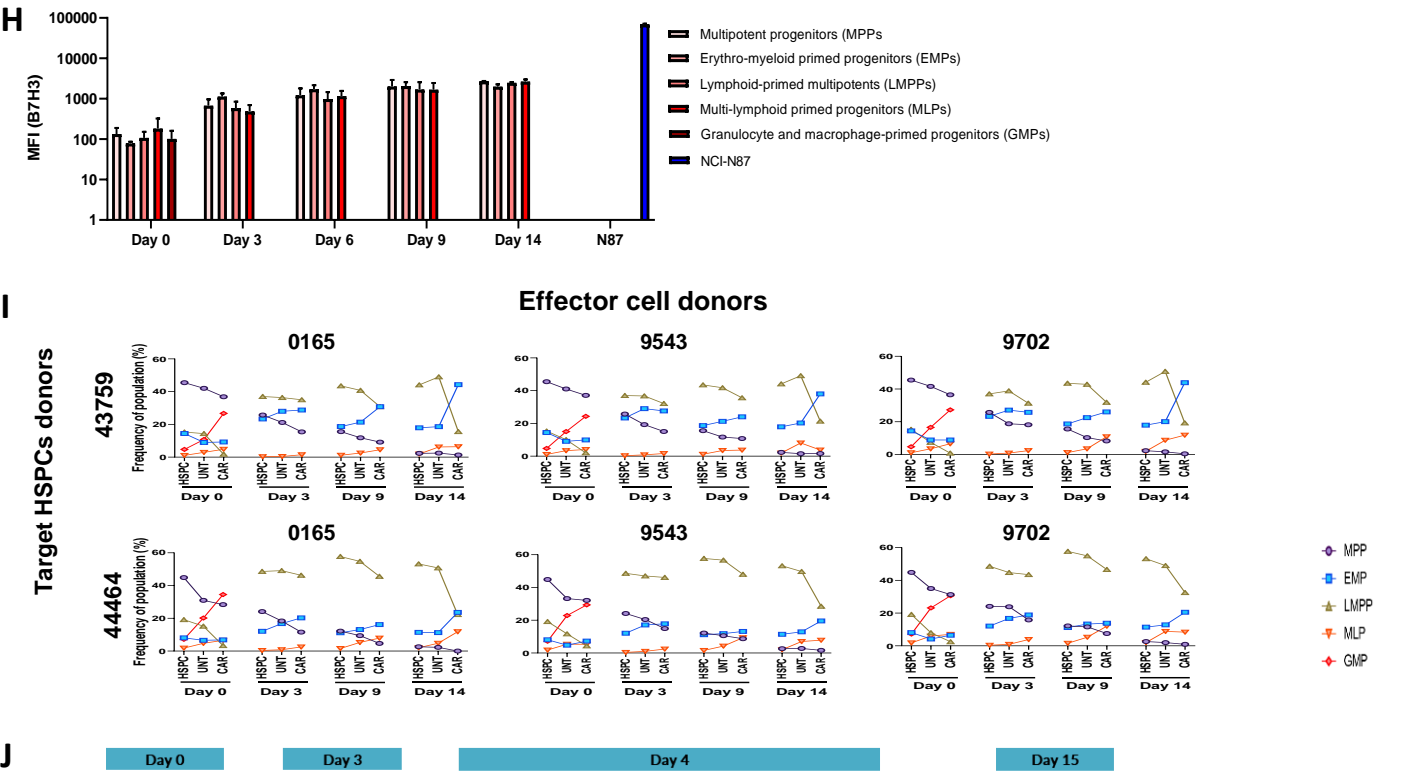

**Supplementary figure 6.** Targeting of allogeneic immune cells by B7H3.CAR EBVSTs. **A**, B7-H3 expression on T, B, NK cells and monocytes after stimulation with various concentrations of GM-CSF, IFN- $\gamma$  and TNF- $\alpha$  for 2 days. **B**, Percentages of T, B and NK cells expressing B7-H3 after stimulation with 60 pg/mL IL-7 and 30 pg/mL 1L-15 for 1 or 2 days. **C**, Experiment set up to evaluate cytotoxicity of B7H3.CAR EBVSTs against cytokines-treated allogeneic PBMCs. **D**, B7-H3 expression on cytokine-treated allogeneic T, B and NK cells from 3 independent after co-culture with EBVSTs from 3 other donors. **E**, Median fluorescence intensities (MFI) of B7-H3 on allogeneic monocytes from 3 independent donors after co-culture with EBVSTs from 3 other donors. **F**, Experiment set up to evaluate B7-H3 expression on antigen-stimulated memory T cells. **G**, Expression of TNF- $\alpha$  and/or IFN $\gamma$  on EBVSTs (left) and CellTrace Violet™ dilution in proliferating cells (right) in response to control or EBV pepmix treatment. **H**, Comparison of B7-H3 expression on NCI-N87 cells and HSPC populations stimulated with Flt3L, TPO and SCF for the indicated number of days. **I**, Cytolysis of Flt3L, TPO and SCF-stimulated HSPC populations following co-culture with UT, B7H3.CAR EBVSTs or no effector cells. **J**, Experimental set up to evaluate effect of B7H3.CAR EBVSTs exposure on the erythroid and myeloid development potential of HSPCs. MPP: multi-potent progenitors, EMP: erythro-myeloid primed progenitors. LMPP: lymphoid-myeloid primed progenitors. MLP: multi-lymphoid primed progenitors. GMP: granulocyte and macrophage primed progenitors. Data in **(A-B)** is compiled from PBMCs from 3 donors. Data in **(H and I)** is compiled from UT and B7H3.CAR EBVSTs generated from 3 donors co-cultured with HSPCs isolated from 2 other different donors.
