# Supplementary material for: B7-H3–Targeting Chimeric Antigen Receptors Epstein-Barr Virus–specific T Cells Provides a Tumor Agnostic Off-The-Shelf Therapy Against B7-H3–positive Solid Tumors
Source: PubMed Central journal article supplement (PMC11149603; doi:10.1158/2767-9764.crc-23-0538), 2024-06-04
Supplement: crc-23-0538-s09.pdf [file crc-23-0538-s09.pdf]

# Supplementary figure 7

## 1. CRS Positive Control Arm (NALM-6)

### Treatment:

1. Untreated
2. CD19.CAR ATC

## 2. Allogenic B7H3 CAR Test Arm

### Treatment:

1. Untreated
2. Untransduced EBVSTs
3. B7H3.CAR EBVSTs

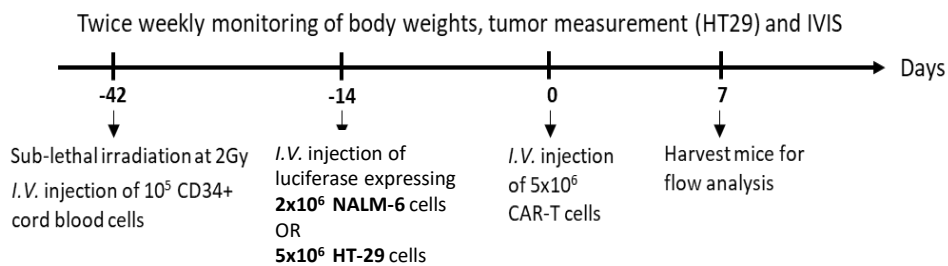

**Supplementary figure 7.** Schematic diagram of study set up to evaluate cytokine-release syndrome associated with allogenic B7H3.CAR EBVSTs.
