# Supplementary material for: B7-H3–Targeting Chimeric Antigen Receptors Epstein-Barr Virus–specific T Cells Provides a Tumor Agnostic Off-The-Shelf Therapy Against B7-H3–positive Solid Tumors
Source: PubMed Central journal article supplement (PMC11149603; doi:10.1158/2767-9764.crc-23-0538), 2024-06-04
Supplement: crc-23-0538-s10.pdf [file crc-23-0538-s10.pdf]

# Supplementary figure 8

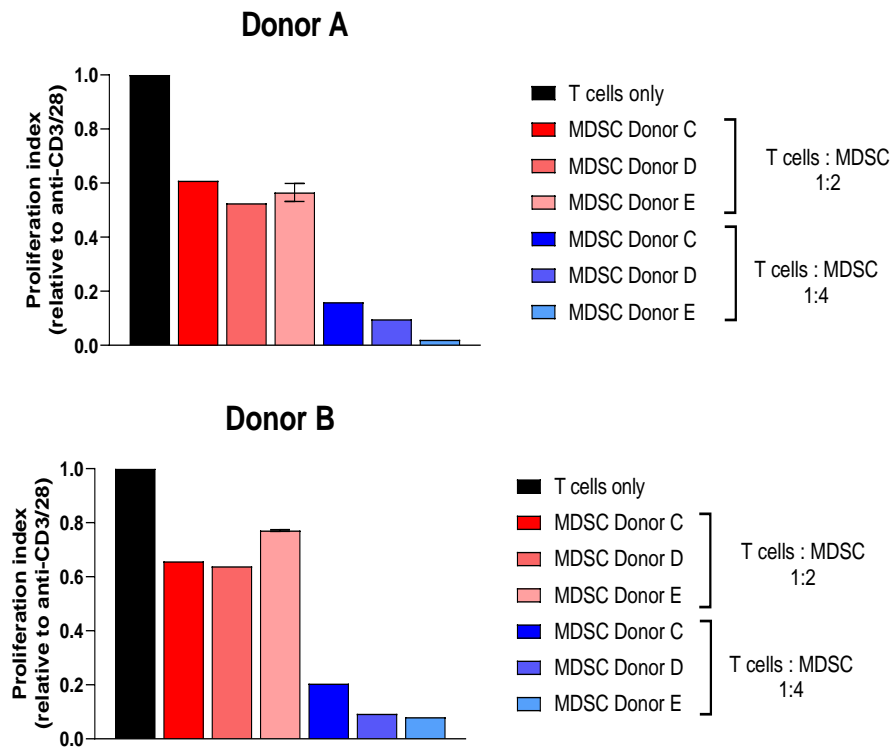

**Supplementary figure 8.** In vitro generated MDSC inhibits T cell proliferation. Proliferation index of anti-CD3/CD28 stimulated T cells from 2 independent donors, in the presence or absence of MDSCs generated from 3 other donors, at T cells: MDSC ratios of 1:2 and 1:4. Proliferation index was calculated by normalising percentages of proliferated cells against no MDSC control condition.
